# Supplementary material
Source: Springer Nature journal article supplement (https://www.springermedizin.de/resource/supplementary/12963_2011_151_MOESM12_ESM.pdf/9572764)

HCE No HCE

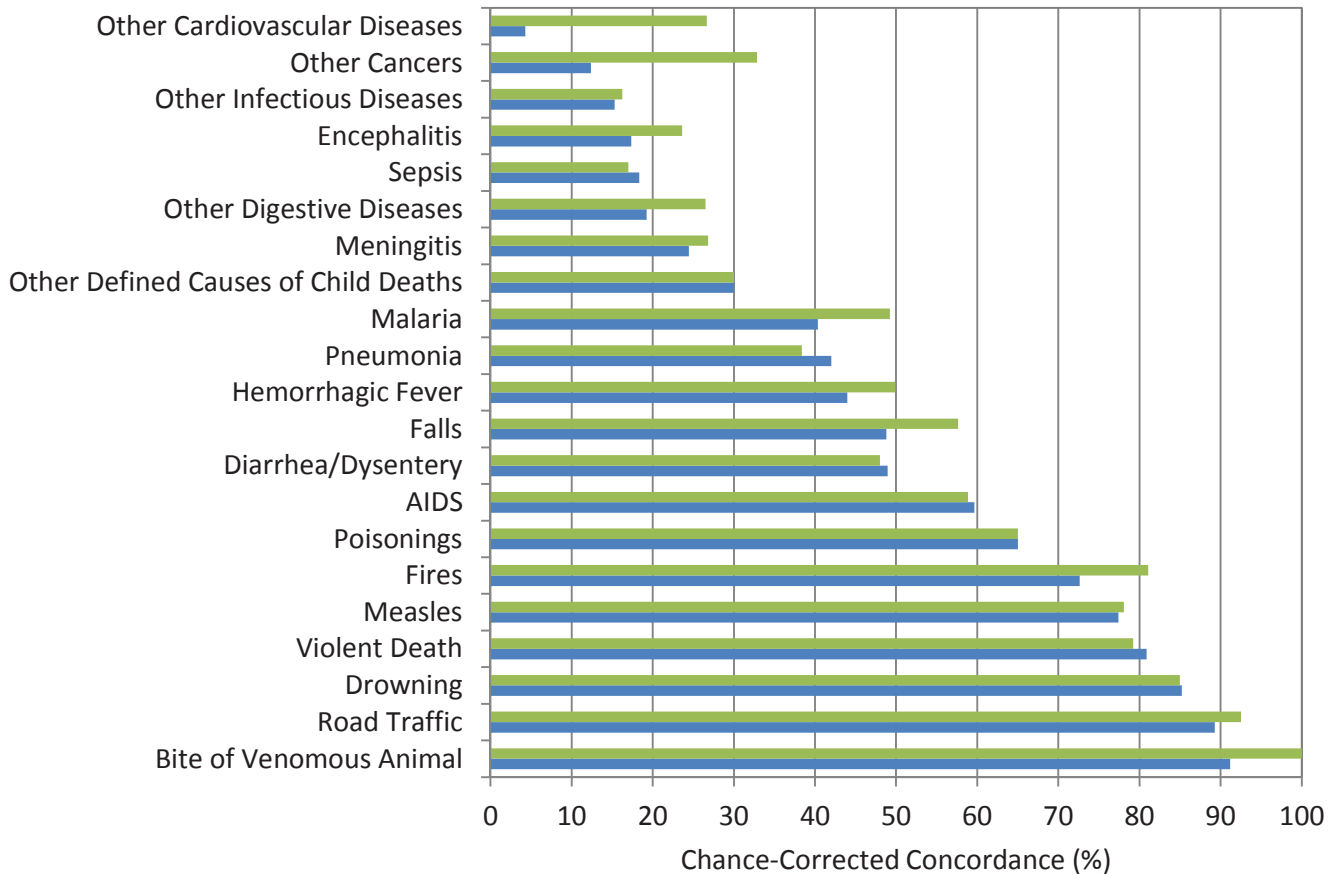

Supplement: MOESM12 [file 9572764]
